# Supplementary material for: A comprehensive overview of FCGR3A gene variability by full-length gene sequencing including the identification of V158F polymorphism
Source: PubMed Central journal article supplement (PMC6206037; doi:10.1038/s41598-018-34258-1), 2018-10-29
Supplement: 41598_2018_34258_MOESM1_ESM.pdf [file 41598_2018_34258_MOESM1_ESM.pdf]

## Supplementary Information

### A comprehensive overview of *FCGR3A* gene variability by full-length gene sequencing including the identification of V158F polymorphism

N.M. Mahaweni<sup>1,2</sup>, T.I. Olieslagers<sup>1</sup>, I. Olivares Rivas<sup>1</sup>, S. J. J. Molenbroeck<sup>1</sup>, M. Groeneweg<sup>1</sup>, G. M. J. Bos<sup>2</sup>, M. G. J. Tilanus<sup>1</sup>, C. E. M. Voorter<sup>1</sup>, L. Wieten<sup>1</sup>

<sup>1</sup> Department of Transplantation Immunology, Tissue Typing Laboratory, GROW School for Oncology and Developmental Biology, Maastricht University Medical Center+, the Netherlands

<sup>2</sup> Department of Internal Medicine, division of Hematology, GROW School for Oncology and Developmental Biology, Maastricht University Medical Center+, the Netherlands

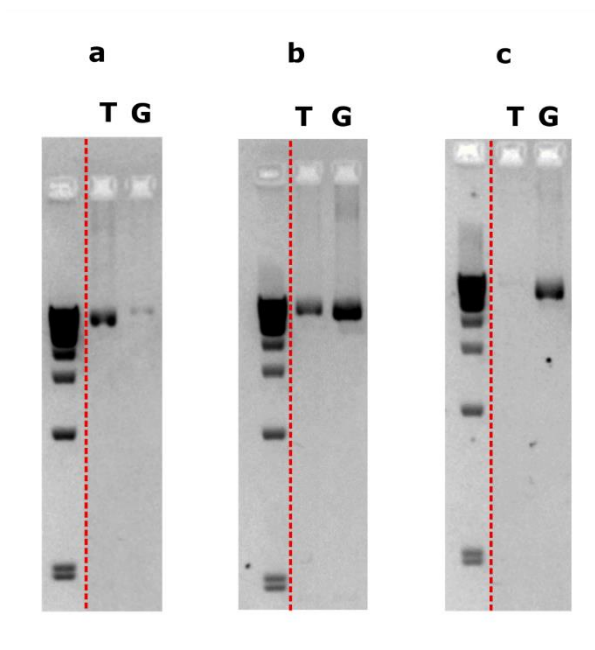

#### Supplementary Figure S1. The detection of V/F polymorphism by SSP showing 3 different genotypes.

Three different DNA samples representing homozygous T (a), heterozygous (b), and homozygous G (c) genotype. T on the lane means the SSP used for amplification was specific for the T allele, while a G indicates the SSP used for amplification was specific for the G allele. Each figure was derived from 3 different gels. Red dotted lines marked the border between the ladder and the samples.
